# Supplementary material for: SARS-CoV-2 spike protein induces inflammation via TLR2-dependent activation of the NF-κB pathway
Source: eLife. 2021 Dec 6;10:e68563. doi: 10.7554/eLife.68563 (PMC8709575; doi:10.7554/eLife.68563)
Supplement: Figure 1—figure supplement 1—source data 1. [file elife-68563-fig1-figsupp1-data1.xlsx]

## Sheet: Sheet1
	Figure 1–figure supplement 1A
		Cont			S2
	IL-6	405	440	390	985	1085	920
	IL-1b	17.135	19.192	25.788	80.731	104.423	92.346
	TNFa	580	720	666.667	1733.33	1486.67	1493.33
	Figure 1–figure supplement 1B
		Con			S1			S2			S1+S2			Comb
	IL-6	0.00230643	0.00222845	0.00208568	0.00580702	0.00632162	0.00684492	0.00916513	0.0103459	0.0108445	0.0147094	0.0138961	0.0142798	0.0142937	0.0155833	0.0148201
	IL-1b	3.23177	3.06963	3.30905	8.42705	8.06819	8.65432	12.464	13.117	13.8501	17.7665	19.0374	20.9945	18.4652	19.1805	17.3845
	TNFa	0.0323242	0.0280327	0.0308268	0.0733919	0.071326	0.0806802	0.1302	0.124399	0.113465	0.187201	0.187179	0.205621	0.214436	0.183538	0.206862
	Figure 1–figure supplement 1C
		Cont			PolyI:C
	IFNa	0.000279342	0.000211901	0.000304835	0.000994869	0.00121063	0.00111402
	IFNb	7.83473e-05	6.98408e-05	9.06581e-05	0.000242936	0.000225399	0.000262386
	IFNg	0.000130744	6.74335e-05	7.30704e-05	0.000469664	0.000430309	0.000489383
	Figure 1–figure supplement 1D
		Cont			S2			S2 (HD)
	IL-6	3.29478e-06	2.97583e-06	3.06094e-06	1.55691e-05	1.76175e-05	1.618e-05	2.57979e-06	2.83982e-06	2.34579e-06
	IL-1b	0.000735758	0.000815762	0.000850212	0.00315455	0.00289851	0.00311841	0.000691741	0.000763629	0.000728716
	TNFa	0.000109627	9.60159e-05	0.000108145	0.000628752	0.000559789	0.000462945	0.000109552	9.30262e-05	0.000113761
	Figure 1–figure supplement 1E
		Con			S1(R&D)			S2(R&D)			S-tri
	IL6	0.00133124	0.00142407	0.00152074	0.00419563	0.00346659	0.00412257	0.00749926	0.00764602	0.00695007	0.00545892	0.00608669	0.00496461
	IL1b	3.40388	3.06772	3.52403	8.52983	8.2968	7.37807	10.629	10.7357	10.4613	10.4972	10.0756	10.5227
	CXCL1	0.0178419	0.0191613	0.0171798	0.0426637	0.0412424	0.0386998	0.0515178	0.0538906	0.0511747	0.0528598	0.0474131	0.0582711
	CXCL2	0.0114854	0.00980875	0.010061	0.0207848	0.0195895	0.0235793	0.0291376	0.0350557	0.0314428	0.03407	0.0383698	0.0372635
