# Supplementary material for: SARS-CoV-2 spike protein induces inflammation via TLR2-dependent activation of the NF-κB pathway
Source: eLife. 2021 Dec 6;10:e68563. doi: 10.7554/eLife.68563 (PMC8709575; doi:10.7554/eLife.68563)
Supplement: Figure 1—figure supplement 2—source data 1. [file elife-68563-fig1-figsupp2-data1.xlsx]

## Sheet: Sheet1
	Figure 1-figure supplement 2A
		Con			S1			S2
	IL6	7.91279e-05	7.46603e-05	6.2717e-05	0.000233316	0.000261134	0.000217897	0.000323261	0.000356062	0.000448737
	Il1b	0.00673513	0.00666176	0.00922129	0.0240799	0.0226072	0.0210349	0.0322771	0.0313818	0.0275173
	TNFa	0.0032867	0.0032648	0.0030332	0.00575134	0.00650691	0.00652633	0.00623449	0.0058583	0.00729369
	CXCL1	5.3332e-06	5.08379e-06	4.60797e-06	1.11061e-05	1.40123e-05	1.35632e-05	1.72688e-05	1.69948e-05	1.4373e-05
	CXCL2	0.00672852	0.00785734	0.0112554	0.021518	0.0237572	0.0190561	0.0241147	0.0277521	0.0260279
	IFNa	0.000169313	0.000144468	0.000106425	0.000172621	0.000154324	0.000159064	0.000165388	0.000153382	0.000153725
	IFNb	9.11615e-05	7.47108e-05	7.87352e-05	8.75456e-05	9.86107e-05	9.32758e-05	0.000104596	8.31282e-05	7.21486e-05
	IFNg	9.71595e-06	6.64264e-06	4.516e-06	9.49504e-06	7.25151e-06	8.9887e-06	6.44507e-06	9.97364e-06	6.64005e-06
	Figure 1-figure supplement 2B
		Con			S1			S2
	IL6	0.000124	0.000588	0.0006	0.0013	0.00203	0.00224	0.00847	0.00381	0.00793
	Il1b	3.69e-07	1.17e-06	5.57e-06	0.141	0.173	0.196	0.426	0.281	0.629
	TNFa	0.00783	0.00985	0.00918	0.164	0.166	0.159	0.192	0.123	0.209
