# Supplementary material for: SARS-CoV-2 spike protein induces inflammation via TLR2-dependent activation of the NF-κB pathway
Source: eLife. 2021 Dec 6;10:e68563. doi: 10.7554/eLife.68563 (PMC8709575; doi:10.7554/eLife.68563)
Supplement: Figure 1—source data 1. [file elife-68563-fig1-data1.xlsx]

## Sheet: Sheet1
	Figure 1A
	Gene	IL-6			Il1b			TNFa			CXCL1			CXCL2			CCL2			IFNa			IFNb			IFNg
	Con	0.00183046	0.00190215	0.00190045	4.00719	3.95726	4.05575	0.0313476	0.0312252	0.0317593	0.0148613	0.0139416	0.0142753	0.0148613	0.0139416	0.0142753	0.337073	0.322409	0.309738	0.000362463	0.000304375	0.000338291	0.00271689	0.00269174	0.00275427	7.68112e-05	7.81545e-05	8.10959e-05
	S1	0.00534445	0.00400304	0.00447133	11.3551	10.8951	11.634	0.081365	0.0860334	0.0900903	0.0328681	0.0318506	0.0285795	0.0328681	0.0318506	0.0285795	0.744837	0.81709	0.798381	0.000352381	0.000338527	0.000314914	0.00266215	0.00295505	0.00266519	8.20655e-05	7.61287e-05	8.06413e-05
	S2	0.0070164	0.00744746	0.00754473	16.9441	16.0767	16.121	0.134731	0.121206	0.131568	0.0364097	0.0350203	0.0392988	0.0418238	0.0402278	0.0451425	1.04627	1.07865	0.960581	0.000324523	0.000347188	0.000309884	0.00272371	0.00281203	0.00261274	8.49738e-05	9.05817e-05	8.04608e-05
	M	0.00201459	0.00192726	0.00215852	4.15221	4.17477	4.243	0.0310403	0.0330999	0.033762	0.0186131	0.0183617	0.0134823	0.0186131	0.0183617	0.0134823	0.354842	0.352364	0.334152	0.000324078	0.000318154	0.000330196	0.00278654	0.00294538	0.00315393	8.43713e-05	7.80854e-05	8.10903e-05
	N	0.00195005	0.00177595	0.00195737	4.09104	3.83409	4.0045	0.0317978	0.0340463	0.0302841	0.0150625	0.0148779	0.0138141	0.0150625	0.0148779	0.0138141	0.326465	0.352285	0.283746	0.000330389	0.000352392	0.000316698	0.00284715	0.00304695	0.00280976	7.80581e-05	8.61564e-05	7.53089e-05
	E	0.00192553	0.00187121	0.00188661	4.08007	3.92874	3.96215	0.030663	0.0334358	0.0308853	0.0147483	0.0132632	0.0138932	0.0147483	0.0132632	0.0138932	0.314147	0.312046	0.312875	0.000320848	0.000304138	0.000321903	0.003148	0.00240239	0.00254728	8.34546e-05	7.39413e-05	7.69807e-05
	Figure 1B
	Concentration	IL-6			IL1b			TNFa			CXCL1			CXCL2
	Cont	0.00185175	0.00213742	0.00229221	3.70165	6.0572	5.81476	0.0334274	0.0310995	0.0282414	0.281971	0.259486	0.259901	0.0973901	0.0904916	0.0863251
	S2 (100 ng/ml)	0.00251934	0.00238226	0.0028899	5.93565	5.57485	4.87151	0.0292787	0.0308336	0.0317565	0.337997	0.271948	0.289746	0.1108	0.0917911	0.101228
	S2 (500 ng/ml)	0.00446895	0.00412815	0.00447483	12.8774	10.1383	14.6725	0.0674946	0.0698867	0.0704178	0.523276	0.61845	0.531569	0.174782	0.15751	0.184113
	S2 (1000 ng/ml)	0.00795227	0.00700138	0.00700215	14.8524	15.5069	16.4409	0.0941184	0.10899	0.0984479	0.869786	0.814118	0.714237	0.315849	0.292215	0.249661
	Figure 1C
	Time Points	IL6			IL1b			TNFa			CXCL1			CXCL2
	0h	0.00247438	0.00305206	0.00250891	4.72036	4.88389	4.94406	0.0234497	0.0236057	0.0225891	0.247735	0.25121	0.260006	0.106385	0.110312	0.11216
	2h	0.00278424	0.0033337	0.00339672	5.01496	4.71614	5.23471	0.0217975	0.0216568	0.0236407	0.314877	0.275368	0.276722	0.121715	0.103077	0.125671
	4h	0.00756407	0.00584859	0.00714212	12.0923	12.0231	14.2825	0.0478404	0.0510229	0.0566267	0.583888	0.598826	0.642918	0.237317	0.243493	0.270723
	8h	0.0106791	0.0114198	0.0086061	19.6073	20.0941	19.6984	0.0865561	0.0843422	0.0783752	0.895188	0.98512	0.920421	0.398001	0.413222	0.403812
	Figure 1D
	Groups	IL6			IL1b			TNFa			CXCL1			CXCL2
	Con	0.0014778	0.00143914	0.00119241	0.00709879	0.00724996	0.00665551	0.0108024	0.008547	0.00888195	0.0114981	0.0100621	0.0102274	0.0150837	0.0144621	0.0127832
	S2	0.00756704	0.00789978	0.00755275	0.0302786	0.0330774	0.0341495	0.0252467	0.0263979	0.0254983	0.0545948	0.0577567	0.0560533	0.062473	0.0623255	0.0603791
	Figure 1E
	Groups	IL6			IL1b			TNFa
	Con	0.00188238	0.00174636	0.0019138	3.35659	3.011	3.34705	0.0380317	0.0319266	0.0349508
	MLN-4760	0.0020923	0.00213055	0.00169529	3.49944	3.10362	2.68887	0.0406222	0.0415574	0.0376634
	S1	0.00618398	0.00552692	0.00578313	7.51592	7.39976	7.27722	0.090444	0.0860711	0.0932502
	S1+MLN-4760	0.00508364	0.00547079	0.0058917	6.27524	6.25869	7.53237	0.0844004	0.0899353	0.0948035
	S2	0.00924289	0.00854028	0.0085739	13.5185	13.7323	14.0794	0.144614	0.159422	0.154205
	S2+MLN-4760	0.0081253	0.00833141	0.00842849	13.537	12.1509	12.9476	0.150504	0.144373	0.144499
