# Supplementary material for: SARS-CoV-2 spike protein induces inflammation via TLR2-dependent activation of the NF-κB pathway
Source: eLife. 2021 Dec 6;10:e68563. doi: 10.7554/eLife.68563 (PMC8709575; doi:10.7554/eLife.68563)
Supplement: Figure 2—figure supplement 1—source data 1. [file elife-68563-fig2-figsupp1-data1.xlsx]

## Sheet: Sheet1
	Figure 2-figure supplement 1
		Con			S1			S2
	IL6	2.66971e-05	3.37511e-05	2.08609e-05	2.5495e-05	2.61725e-05	2.95727e-05	3.66536e-05	4.53344e-05	3.54414e-05
	IL1b	2.036e-05	1.965e-05	2.191e-05	1.373e-05	2.456e-05	2.256e-05	2.026e-05	2.351e-05	1.72e-05
	TNFa	6.70677e-06	8.69158e-06	8.75501e-06	9.33569e-06	1.01197e-05	7.73819e-06	9.96474e-06	8.17191e-06	8.88297e-06
	CXCL1	0.0037959	0.0063501	0.0073422	0.0066318	0.0077101	0.0071612	0.0086296	0.0098254	0.0051682
	CXCL2	0.0033997	0.0032459	0.0031825	0.0036669	0.003369	0.0040382	0.0025436	0.0033329	0.0038286
