# Supplementary material for: SARS-CoV-2 spike protein induces inflammation via TLR2-dependent activation of the NF-κB pathway
Source: eLife. 2021 Dec 6;10:e68563. doi: 10.7554/eLife.68563 (PMC8709575; doi:10.7554/eLife.68563)
Supplement: Figure 2—source data 1. [file elife-68563-fig2-data1.xlsx]

## Sheet: Sheet1
		Figure 2A
	Gene	Time Points	Con			S1			S2
	IL6	12h	0.000188786	0.000252889	0.000204698	0.000314693	0.000349246	0.000285183	0.000386772	0.00033681	0.000271269
		24h	0.000140975	0.00018456	0.00025006	0.000328964	0.000351998	0.000332354	0.000492477	0.000492328	0.000472721
	IL1b	12h	7.97934e-05	6.72391e-05	5.37131e-05	0.000108132	0.000108707	9.29513e-05	0.000142219	0.000108347	0.000143299
		24h	8.26206e-05	9.07958e-05	0.000102861	0.000157358	0.000155898	0.000189178	0.000203538	0.000220474	0.000193862
	TNFa	12h	2.63554e-05	2.59878e-05	2.73234e-05	3.98921e-05	4.66313e-05	3.93231e-05	5.21018e-05	5.31329e-05	5.03019e-05
		24h	3.15428e-05	3.88275e-05	3.29732e-05	7.69854e-05	6.20436e-05	7.33072e-05	9.91396e-05	8.73968e-05	8.97903e-05
	CXCL1	12h	0.0102987	0.00975	0.0104374	0.01238	0.012535	0.0116296	0.0136627	0.0128207	0.013256
		24h	0.0115443	0.0115776	0.0122027	0.0193794	0.0179033	0.0194715	0.0278933	0.0270391	0.0277684
	CXCL2	12h	0.00536699	0.00518382	0.00556206	0.00751296	0.0075815	0.0071106	0.00788088	0.00673848	0.0082046
		24h	0.0060463	0.00686793	0.00715406	0.0104864	0.0101138	0.0117208	0.0162859	0.0173219	0.0164839
		Figure 2B
	Gene	Time Points	Con			S1			S2
	IL6	12h	0.00120667	0.0010057	0.0011334	0.0014021	0.0013886	0.00131283	0.00153007	0.00144767	0.00160322
		24h	0.0012949	0.00120439	0.00128935	0.00236716	0.00224859	0.00255376	0.00339797	0.00283814	0.00288048
	IL1b	12h	0.000556472	0.000454047	0.000508663	0.000727404	0.000668784	0.000651574	0.000646453	0.000695112	0.000738306
		24h	0.000636991	0.000625926	0.000653504	0.00106736	0.00121453	0.00109547	0.0014206	0.00154895	0.00149514
	TNFa	12h	3.79189e-05	4.21985e-05	3.41242e-05	5.76731e-05	6.80134e-05	5.59305e-05	6.48991e-05	7.33445e-05	7.39534e-05
		24h	5.01933e-05	4.10188e-05	4.69607e-05	7.81036e-05	7.68002e-05	7.1625e-05	0.000133431	0.000115305	0.000119202
	CXCL1	12h	0.0701056	0.0703477	0.0675221	0.138536	0.1416	0.108074	0.144494	0.130368	0.15582
		24h	0.0799039	0.0743953	0.0777086	0.128666	0.146129	0.127734	0.177328	0.181613	0.197178
	CXCL2	12h	0.00640372	0.00523811	0.00737308	0.00918499	0.00861113	0.00999217	0.0101342	0.00980485	0.00781607
		24h	0.011335	0.0097769	0.0108182	0.0183468	0.0203578	0.0190315	0.0266684	0.0281813	0.0236905
		Figure 2C
	Gene	Time Points	Con			S2
	Il6	12h	0.562265	0.58373	0.583321	2.27653	2.01773	2.31483
		24h	0.672681	0.741888	0.798467	0.698102	0.819036	0.69504
	Il1b	12h	0.00255007	0.00241937	0.00265424	0.0118263	0.0104962	0.0124457
		24h	0.00347467	0.00351761	0.00369711	0.00932659	0.0118187	0.0110312
	Tnfa	12h	0.00372092	0.00415237	0.00367804	0.010479	0.00988699	0.0101139
		24h	0.00477603	0.00516506	0.00522607	0.00531195	0.00598226	0.00596523
	cxcl1	12h	0.00671466	0.0063061	0.00711161	0.0297371	0.0256668	0.0277168
		24h	0.0101461	0.010625	0.00966159	0.0140823	0.0157934	0.0145804
	Cxcl2	12h	0.00411993	0.00420452	0.00407513	0.0138305	0.0119229	0.0135162
		24h	0.0055693	0.00592254	0.00596789	0.00873158	0.00985137	0.0091679
		Figure 2D
		Time Points	Con			S2
	Il6	12h	110	114	122	186	190	196
		24h	142	122	130	242	250	266
	Il1b	12h	49.231	40.894	46.308	69.721	60.635	60.712
		24h	52.442	52.519	57.115	110.471	122.904	129.308
	Tnfa	12h	16	11.8	13	20.2	24	18.6
		24h	16	17.6	14	38.4	40.2	43.6
		Figure 2E
		Time Points	Con			S2
	Il6	12h	5.83	5.076	5.059	7.643	7.785	7.996
		24h	5.689	5.492	5.133	7.73	7.512	7.991
	Il1b	12h	1.205	1.378	1.242	3.463	3.572	3.764
		24h	1.632	1.623	1.465	4.922	4.868	5.054
	Tnfa	12h	0.741	0.778	0.744	1.518	1.447	1.47
		24h	0.883	0.826	0.831	1.641	1.852	1.816
