# Supplementary material for: SARS-CoV-2 spike protein induces inflammation via TLR2-dependent activation of the NF-κB pathway
Source: eLife. 2021 Dec 6;10:e68563. doi: 10.7554/eLife.68563 (PMC8709575; doi:10.7554/eLife.68563)
Supplement: Figure 3—figure supplement 1—source data 1. [file elife-68563-fig3-figsupp1-data1.xlsx]

## Sheet: Sheet1
	Figure 3-figure supplement 1B
		GFP			Spike
	IL6	0.000294732	0.000270043	0.000312691	0.000285489	0.000298512	0.000324175
	IL1b	0.000196107	0.000200316	0.000229886	0.000363789	0.000436797	0.000262726
	TNFa	3.42265e-05	3.75406e-05	4.10514e-05	3.02487e-05	3.48395e-05	3.22157e-05
	CXCL1	0.0147505	0.0150952	0.0154115	0.0134208	0.0158976	0.0157129
	CXCL2	0.00811014	0.00803523	0.0091311	0.00843834	0.00931797	0.00969338
	Figure 3-figure supplement 1C
		GFP			Spike
	IL6	0.0171796	0.0137795	0.0158323	0.0159831	0.0192996	0.0197562
	IL1b	0.00138562	0.00106098	0.00123668	0.00131861	0.00128223	0.00134713
	TNFa	0.000101647	8.18318e-05	6.731e-05	0.000112574	9.4685e-05	8.91371e-05
	CXCL1	0.1622	0.126767	0.141502	0.165805	0.13699	0.132523
	CXCL2	0.0540734	0.0412376	0.0507126	0.0574846	0.0510284	0.0555498
	Figure 3-figure supplement 1D
		GFP			Spike
	IL6	0.000366363	0.000269009	0.000321397	0.00043664	0.000280285	0.000314923
	IL1b	0.000190005	0.000136286	0.000125369	0.000249159	0.000212083	0.000202008
	TNFa	7.80343e-06	1.08266e-05	1.25279e-05	1.65593e-05	1.39184e-05	8.63758e-06
	CXCL1	0.000386186	0.000461059	0.000399188	0.000456128	0.00035263	0.000420078
	CXCL2	0.000381236	0.000570209	0.000477287	0.000585848	0.000436421	0.000631758
