# Supplementary material for: SARS-CoV-2 spike protein induces inflammation via TLR2-dependent activation of the NF-κB pathway
Source: eLife. 2021 Dec 6;10:e68563. doi: 10.7554/eLife.68563 (PMC8709575; doi:10.7554/eLife.68563)
Supplement: Figure 3—figure supplement 2—source data 1. [file elife-68563-fig3-figsupp2-data1.xlsx]

## Sheet: Sheet1
	Figure 3-figure supplement 2A
		GFP			Spike
	IL-6	0.00302617	0.0028059	0.00320425	0.00298199	0.00352199	0.00260937
	IL-1b	5.49162	5.0779	6.29497	5.62941	5.5684	4.73406
	TNFa	0.0190254	0.01976	0.0184073	0.0195981	0.0136468	0.0121215
	Figure 3-figure supplement 2B
		GFP				SARS-CoV-2 S
	HEK293T	0	0	0	0	16.104	14.532	17.728	18.888
	A549	0	0	0	0	12.92	12.132	14.088	13.608
	HEK293T	0	0	0	0	0	0	0	0
	A549	0	0	0	0	0	0	0	0
	Figure 3-figure supplement 2D
		GFP			Spike
	IL-6	0.000236762	0.000200347	0.000192193	0.00044949	0.000566455	0.000462222
	IL-1b	0.158813	0.147373	0.157765	0.631311	0.461609	0.491103
	TNFa	0.000159976	0.000146801	0.000174431	0.00066814	0.000583476	0.000646488
	Figure 3-figure supplement 2E
		GFP			Spike
	IL-6	437.5	550	362.5	1300	1175	1425
	IL-1b	60.692	53.269	56.038	160.865	156.115	170.788
	TNFa	1016.67	933.333	1133.33	2350	2616.67	2466.67
	Figure 3-figure supplement 2G
		GFP			Spike
	IL-6	0.0221219	0.020586	0.0217711	0.0796911	0.0698958	0.0692881
	IL-1b	0.187276	0.196671	0.201548	0.665996	0.623439	0.652336
	TNFa	0.000228885	0.000241858	0.000279454	0.00109317	0.000969122	0.00125823
	CXCL1	0.0668534	0.064057	0.0677134	0.161211	0.144186	0.14625
	CXCL2	0.0256146	0.0236666	0.0225648	0.0787437	0.0712677	0.0845716
