# Supplementary material for: SARS-CoV-2 spike protein induces inflammation via TLR2-dependent activation of the NF-κB pathway
Source: eLife. 2021 Dec 6;10:e68563. doi: 10.7554/eLife.68563 (PMC8709575; doi:10.7554/eLife.68563)
Supplement: Figure 3—source data 1. [file elife-68563-fig3-data1.xlsx]

## Sheet: Sheet1
		Figure 3B
	Gene	GFP			Spike
	IL6	0.00294018	0.00292604	0.00334018	0.00308938	0.0028894	0.00623623
	IL1b	6.44731	5.99223	7.03981	5.69412	5.59064	6.94707
	TNFa	0.0141272	0.0160904	0.0146272	0.0144299	0.0225635	0.0164953
		Figure 3C
	Gene	GFP			Spike
	IL6	0.00387712	0.00388995	0.00475211	0.0040754	0.00386994	0.00411196
	IL1b	7.77855	7.37028	8.32436	7.69525	7.57791	8.46157
	TNFa	0.0136068	0.0157217	0.0148225	0.0168453	0.0140987	0.0126709
		Figure 3E
	Gene	GFP			Spike
	IL6	0.000338384	0.0002858	0.000284278	0.000450695	0.000501776	0.000489241
	IL1b	0.111766	0.102537	0.0861576	0.239478	0.235532	0.242082
	TNFa	0.000157221	0.000220025	0.000213215	0.000377238	0.000356463	0.000431007
		Figure 3F
	Gene	GFP			Spike
	IL6	0.026715	0.0267328	0.0311311	0.0625914	0.0659523	0.0596108
	IL1b	0.000808397	0.000845906	0.000929751	0.00182368	0.00212418	0.00191832
	TNFa	0.000767043	0.000892017	0.000921967	0.00282163	0.00361208	0.00319836
		Figure 3G
		GFP			Spike
	IL6	550	625	725	1125	1362.5	1262.5
	IL1b	134.423	107.5	126.615	292.654	263.077	272.5
	TNFa	850	766.667	966.667	1516.67	1483.33	1633.33
		Figure 3H
		GFP			Spike
	IL6	188.167	181.667	238	632.667	514.833	581.167
	IL1b	68.135	67.115	86.577	182.904	183.058	171.942
	TNFa	115	100	102	547	455	553
