# Supplementary material for: SARS-CoV-2 spike protein induces inflammation via TLR2-dependent activation of the NF-κB pathway
Source: eLife. 2021 Dec 6;10:e68563. doi: 10.7554/eLife.68563 (PMC8709575; doi:10.7554/eLife.68563)
Supplement: Figure 4—source data 1. [file elife-68563-fig4-data1.xlsx]

## Sheet: Sheet1
		Figure 4D
	Gene	Con			S2			S2+Sc514
	IL6	0.00240361	0.00266872	0.00243764	0.00747251	0.00803839	0.00760878	0.00337425	0.00372125	0.0037431
	IL1b	4.90129	4.79263	4.30884	16.711	15.9286	15.3457	5.40393	5.72061	5.86174
	TNFa	0.0269867	0.0273711	0.0278137	0.0795045	0.0787318	0.0770476	0.0306629	0.034087	0.0337078
	CXCL1	0.145626	0.132787	0.130619	0.427394	0.378678	0.3916	0.178505	0.173695	0.176213
	CXCL2	0.0802931	0.0729053	0.0923352	0.29241	0.29838	0.271308	0.110755	0.106261	0.10413
