# Supplementary material for: SARS-CoV-2 spike protein induces inflammation via TLR2-dependent activation of the NF-κB pathway
Source: eLife. 2021 Dec 6;10:e68563. doi: 10.7554/eLife.68563 (PMC8709575; doi:10.7554/eLife.68563)
Supplement: Figure 5—figure supplement 1—source data 1. [file elife-68563-fig5-figsupp1-data1.xlsx]

## Sheet: Sheet1
	Figure 5-figure supplement 1
			Con			LPS			Pam3
	IL6	WT	0.000141007	0.000101219	0.000178312	0.0146427	0.0137057	0.0132107	0.0104301	0.0113843	0.00961089
		Tlr2-/-	0.00014672	0.000173497	0.000159807	0.0130584	0.0137612	0.011879	0.000195941	0.000127514	0.000149579
	IL1b	WT	0.00262255	0.00214861	0.0020114	0.0784776	0.10297	0.087008	0.0757737	0.0720045	0.0532497
		Tlr2-/-	0.00241038	0.00228093	0.00248215	0.0908676	0.107531	0.0917387	0.00208948	0.00245877	0.00271739
	TNFa	WT	0.00211283	0.00153556	0.00182165	0.0496226	0.0545004	0.0513308	0.0338408	0.0351734	0.0374209
		Tlr2-/-	0.0017693	0.00232132	0.00219783	0.0485971	0.0463653	0.0563053	0.00210735	0.0020754	0.00264498
