# Supplementary material for: SARS-CoV-2 spike protein induces inflammation via TLR2-dependent activation of the NF-κB pathway
Source: eLife. 2021 Dec 6;10:e68563. doi: 10.7554/eLife.68563 (PMC8709575; doi:10.7554/eLife.68563)
Supplement: Figure 5—figure supplement 2—source data 1. [file elife-68563-fig5-figsupp2-data1.xlsx]

## Sheet: Sheet1
		Figure 5-figure supplement 2
			Con			S2			C29			C29+S2
		IL6	0.00137702	0.00160267	0.00164967	0.00407354	0.00389484	0.00397223	0.0018175	0.00158907	0.00202363	0.00203931	0.0019649	0.00167357
		IL1b	0.000651712	0.0007032	0.000755021	0.00178698	0.00189211	0.00175804	0.000850158	0.000693483	0.00069187	0.000688532	0.000785994	0.000709242
		TNFa	5.32459e-05	4.51324e-05	4.28964e-05	0.000120227	0.000135617	0.00010881	4.86264e-05	4.89514e-05	5.7968e-05	4.985e-05	5.82086e-05	5.77823e-05
		CXCL1	0.0900729	0.0952408	0.0983455	0.253473	0.268687	0.241604	0.111528	0.10773	0.105237	0.11699	0.0957868	0.110887
