# Supplementary material for: SARS-CoV-2 spike protein induces inflammation via TLR2-dependent activation of the NF-κB pathway
Source: eLife. 2021 Dec 6;10:e68563. doi: 10.7554/eLife.68563 (PMC8709575; doi:10.7554/eLife.68563)
Supplement: Figure 5—source data 1. [file elife-68563-fig5-data1.xlsx]

## Sheet: Sheet1
		Figure 5B
			WT			MyD88-/-
	Il6	Cont	0.000110105	9.19095e-05	8.90648e-05	7.51088e-05	9.61942e-05	9.10964e-05
		S2	0.000405411	0.000445732	0.000507947	0.000126853	0.000113116	0.000140877
	Il1b	Cont	0.000858176	0.000733403	0.000770456	0.000801358	0.000680673	0.000618159
		S2	0.00307851	0.00327102	0.0034897	0.00132257	0.00121104	0.00111531
	Tnfa	Cont	0.00216462	0.0020283	0.00199661	0.0020057	0.00178588	0.0017918
		S2	0.00606907	0.00664266	0.00756569	0.00243604	0.00213008	0.0022896
		Figure 5E
			Con			Tlr2-/-			TLR4-/-
	Il6	Cont	0.000127923	0.000126316	0.000112083	0.000108969	0.000135618	0.000126941	0.000129771	9.61109e-05	0.000118568
		S2	0.000482449	0.00049813	0.000599722	0.000146369	0.000148995	0.000139843	0.000562141	0.000473871	0.000502204
	Il1b	Cont	0.000936901	0.000950491	0.000966165	0.000894864	0.0010005	0.000939505	0.000911504	0.000928309	0.000865397
		S2	0.0030949	0.00297963	0.00284342	0.00112374	0.00103438	0.0010738	0.00297792	0.00259663	0.00281002
	Tnfa	Cont	0.00291234	0.00261697	0.00256248	0.00265997	0.00289558	0.00289314	0.00238868	0.00252659	0.00226693
		S2	0.00788285	0.00816488	0.00789758	0.00341082	0.00296008	0.00352118	0.00694824	0.00742859	0.00758021
		Figure 5F
			Con			Tlr2-/-			TLR4-/-
	Il6	Cont	0.000826115	0.000754348	0.000835403	0.000672242	0.000655994	0.00077579	0.000814253	0.000727573	0.000788368
		S-tri	0.00365358	0.00317542	0.00320779	0.00092126	0.00103089	0.00076415	0.00376377	0.00350603	0.00357414
	Il1b	Cont	0.00159211	0.00144186	0.00162615	0.0020636	0.00160657	0.00211454	0.00154505	0.00151935	0.00144158
		S-tri	0.00684824	0.00622816	0.00623919	0.00208372	0.00218189	0.00210394	0.00699355	0.0064645	0.00664032
	Tnfa	Cont	0.0170272	0.017179	0.0174336	0.016385	0.0153073	0.018278	0.0153356	0.0161569	0.0163384
		S-tri	0.0796027	0.0818125	0.0707588	0.0170932	0.0192828	0.0185741	0.0795238	0.0761172	0.0706436
		Figure 5G
			Con			C29			S2			S2+C29			Pam3			Pam3+C29			LPS			LPS+C29
		Il6	0.00218096	0.00222079	0.00252154	0.00197916	0.002147	0.00180121	0.0126645	0.0112701	0.0122456	0.00172299	0.00208079	0.00195712	0.0305049	0.0326934	0.0311473	0.001823	0.00200154	0.00198893	0.0225861	0.020496	0.0212388	0.0229821	0.0209487	0.0221862
		Il1b	3.639	3.50608	3.64653	3.32595	2.65155	3.21527	13.3698	13.3644	14.181	3.34363	3.81188	3.72617	23.9974	22.5414	24.6584	3.33394	3.52044	3.15762	20.3021	19.2984	19.4139	17.762	18.7045	20.3346
		Tnfa	0.0175477	0.017362	0.0193605	0.018896	0.0194765	0.0183063	0.0936076	0.105237	0.1017	0.0173041	0.0185903	0.0194962	0.19158	0.225442	0.209097	0.016147	0.0168258	0.0142375	0.166664	0.158161	0.162168	0.162493	0.144198	0.149458
		Figure 5H
			WT					Tlr2-/-
	IL6	Cont	0.403	0.685	0.407	0.423	0.55	0.673	0.419	0.472	0.674	0.424
		S1+S2	1.465	1.62	1.432	1.196	1.749	0.67	0.527	0.576	0.672	0.79
	IL1b	Cont	4.077	3.727	4.403	3.947	4.374	4.62	4.598	4.222	4.069	4.522
		S1+S2	11.284	10.354	10.606	11.104	11.621	5.933	6.133	5.067	6.156	5.427
	TNFa	Cont	0.381	0.32	0.298	0.365	0.318	0.289	0.239	0.348	0.286	0.341
		S1+S2	0.859	0.797	0.835	0.789	0.796	0.446	0.421	0.471	0.477	0.446
