# Supplementary material for: SARS-CoV-2 spike protein induces inflammation via TLR2-dependent activation of the NF-κB pathway
Source: eLife. 2021 Dec 6;10:e68563. doi: 10.7554/eLife.68563 (PMC8709575; doi:10.7554/eLife.68563)
Supplement: Figure 6—figure supplement 1—source data 1. [file elife-68563-fig6-figsupp1-data1.xlsx]

## Sheet: Sheet1
		Figure 6–figure supplement 1
			Con			S2			S1			M			N			E			Pam3			LPS
		HEK-TLR2	0.1991	0.1968	0.1814	0.7628	0.8298	0.8129	0.7308	0.7284	0.7342	0.2168	0.2126	0.1818	0.2098	0.2144	0.1929	0.2071	0.2149	0.1866	0.5861	0.7623	0.7887	0.1888	0.2199	0.213
		HEK-TLR4	0.1862	0.2112	0.2037	0.2099	0.2265	0.2311	0.2079	0.235	0.2113	0.2161	0.2355	0.1965	0.2214	0.2323	0.2045	0.2182	0.2384	0.217	0.2078	0.2373	0.2	0.8009	0.8031	0.7796
