# Supplementary material for: SARS-CoV-2 spike protein induces inflammation via TLR2-dependent activation of the NF-κB pathway
Source: eLife. 2021 Dec 6;10:e68563. doi: 10.7554/eLife.68563 (PMC8709575; doi:10.7554/eLife.68563)
Supplement: Figure 6—figure supplement 2—source data 1. [file elife-68563-fig6-figsupp2-data1.xlsx]

## Sheet: Sheet1
		Figure 6–figure supplement 2A
			Cont			TLR1-KO			TLR2-KO			TLR6-KO			TLR1-TLR6-KO
		Tlr1	0.0116295	0.0117918	0.0124246	0.000639741	0.000490992	0.000543556	0.0123286	0.0106272	0.0116595	0.0131055	0.0129533	0.01149	0.000721954	0.000594546	0.000786435
		Tlr2	0.443389	0.439678	0.439838	0.414081	0.482373	0.435206	0.0132703	0.0166271	0.0176167	0.468941	0.442002	0.410251	0.443662	0.373816	0.399246
		Tlr6	0.0088094	0.00858537	0.00748154	0.0107234	0.00794869	0.010071	0.00867398	0.00795567	0.00946846	0.000622721	0.000905581	0.00064127	0.000588828	0.000610015	0.000730629
		Tlr4	0.020002	0.0188007	0.0235394	0.0191918	0.0200116	0.0190174	0.022426	0.0210245	0.0190879	0.0199669	0.021927	0.022375	0.0202936	0.0203265	0.0217177
		Figure 6–figure supplement 2B
			Con			Null			Tlr1-KO			Tlr2-KO			Tlr6-KO			Tlr1-Tlr6-KO
		Pam3CSK4	6.91339e-07	7.94588e-07	5.98061e-07	0.00281343	0.00282353	0.0029316	2.21389e-05	2.27517e-05	2.35026e-05	6.65078e-06	7.94166e-06	6.80118e-06	0.00276034	0.00275993	0.00328728	7.31488e-05	7.66012e-05	6.7762e-05
		FSL1	3.13823e-06	4.10093e-06	3.10944e-06	0.0014823	0.00144286	0.00132557	0.00149653	0.00149953	0.00169808	6.73917e-05	7.19996e-05	8.38525e-05	8.32906e-05	8.47366e-05	6.78294e-05	7.35822e-05	7.48913e-05	8.01619e-05
		LPS	2.04283e-06	1.93734e-06	2.00224e-06	0.14283	0.124157	0.148318	0.139185	0.149807	0.159073	0.139804	0.120266	0.133467	0.149227	0.155984	0.155031	0.167377	0.150473	0.146482
