# Supplementary material for: SARS-CoV-2 spike protein induces inflammation via TLR2-dependent activation of the NF-κB pathway
Source: eLife. 2021 Dec 6;10:e68563. doi: 10.7554/eLife.68563 (PMC8709575; doi:10.7554/eLife.68563)
Supplement: Figure 6—source data 1. [file elife-68563-fig6-data1.xlsx]

## Sheet: Sheet1
		Figure 6B
			HEK-Blue-Null			HEK-Blue-TLR2			HEK-Blue-TLR2-TLR1			HEK-Blue-TLR2-TLR6			HEK-Blue-TLR4
		Con	0.149	0.1861	0.2006	0.1631	0.2114	0.1797	0.2103	0.1942	0.1812	0.166	0.1661	0.1879	0.1755	0.1741	0.1573
		FSL-1	0.1582	0.1754	0.1926	0.8762	1.1549	1.2051	0.207	0.2076	0.211	1.1227	1.2049	1.1426	0.1972	0.2013	0.2118
		Pam3	0.1708	0.1498	0.2216	0.8971	1.0516	1.0998	1.0844	1.1064	0.9843	0.2288	0.1992	0.2063	0.2196	0.1945	0.2162
		LPS	0.1545	0.1733	0.1597	0.1999	0.235	0.2228	0.1983	0.2155	0.2241	0.2253	0.2037	0.1942	1.1766	1.1185	1.0463
		S1	0.1565	0.1705	0.156	0.7932	0.9638	0.9392	0.9631	0.9257	0.8609	1.066	0.982	0.9169	0.2134	0.2275	0.2146
		S2	0.1622	0.1566	0.209	0.9175	0.9326	0.8802	0.9913	0.9187	0.8892	0.9201	0.956	0.9117	0.2034	0.1794	0.1922
		S-tri	0.1589	0.1775	0.1722	0.7653	0.8724	0.855	0.7914	0.7457	0.8807	0.8586	0.8858	0.848	0.1879	0.2174	0.1918
		Figure 6D
			HEK-Null			HEK-TLR2			HEK-TLR2-TLR1			HEK-TLR2-TLR6			HEK-TLR4
	IL6	Con	6.72961e-05	7.32782e-05	6.2702e-05	7.22043e-05	7.68433e-05	6.88527e-05	7.8994e-05	8.195e-05	8.38477e-05	0.000135244	9.14025e-05	0.000114064	6.38507e-05	6.62861e-05	6.13739e-05
		S2	8.47019e-05	7.57224e-05	6.61863e-05	0.000573977	0.000589872	0.000586772	0.000614866	0.000516751	0.000612862	0.000536062	0.000624639	0.000557769	6.001e-05	7.58697e-05	8.44966e-05
	IL1b	Con	0.000143172	0.000132318	0.000122988	0.000155975	0.000130975	0.000114143	0.000149345	0.000151281	0.000144531	0.000165489	0.000178798	0.000138495	0.000115284	0.000131602	0.000123668
		S2	0.000116335	0.000116393	0.000133398	0.000734788	0.000716041	0.000750718	0.000722846	0.000588771	0.000693091	0.000621899	0.00078997	0.000740096	8.82503e-05	0.000107586	0.000130144
		Figure 6F
			Con			S2			S1			C29			C29+S2			C29+S1
	HEK-TLR2		0.2301	0.2505	0.2388	0.5292	0.575	0.5516	0.5307	0.5737	0.5393	0.2716	0.3056	0.2941	0.2679	0.2985	0.2986	0.2754	0.324	0.3092
	HEK-TLR2-TLR1		0.246	0.2937	0.2915	0.4799	0.5546	0.5558	0.4855	0.5396	0.535	0.2366	0.2793	0.276	0.227	0.275	0.2614	0.2217	0.2241	0.256
	HEK-TLR2-TLR6		0.1924	0.2481	0.2241	0.5541	0.542	0.4876	0.5742	0.5397	0.4967	0.3098	0.2956	0.2607	0.3081	0.29	0.255	0.2859	0.2783	0.2586
		Figure 6G
		Con			Null			Tlr1-KO			Tlr2-KO			Tlr6-KO			Tlr1-Tlr6-KO
	Il6	5.23833e-06	5.54626e-06	5.38574e-06	2.68822e-05	2.7723e-05	2.88212e-05	2.67535e-05	2.6875e-05	3.1152e-05	5.8676e-06	8.58276e-06	7.04141e-06	2.5481e-05	2.79182e-05	2.69033e-05	6.04736e-06	6.07181e-06	5.47395e-06
	Il1b	3.21984e-05	3.64115e-05	2.9055e-05	0.000148157	0.000143252	0.000155768	0.000139213	0.000122282	0.000146206	3.40461e-05	3.33508e-05	3.72654e-05	0.000129579	0.000142339	0.000127477	3.08179e-05	3.11912e-05	3.29257e-05
	Tnfa	0.00304083	0.00346654	0.00306786	0.0141324	0.0134463	0.0144713	0.0143115	0.0129798	0.0149095	0.00383911	0.00420728	0.00341431	0.0136842	0.0143984	0.0132243	0.00315681	0.00329735	0.00309471
