# Supplementary material for: SARS-CoV-2 spike protein induces inflammation via TLR2-dependent activation of the NF-κB pathway
Source: eLife journal article supplement (doi:10.7554/elife.68563), 2021-12-02

B

Figure 1 shows two rows of 96-well plates. The top row is labeled 'HEK-2LR2' and the bottom row is labeled 'HEK-2LR4'. Each row contains 9 wells, labeled 'Con', 'S-2', 'S-1', 'M', 'N', 'E', 'Pam3', and 'LPS'. The wells show varying degrees of red color, indicating different levels of response to the ligands.

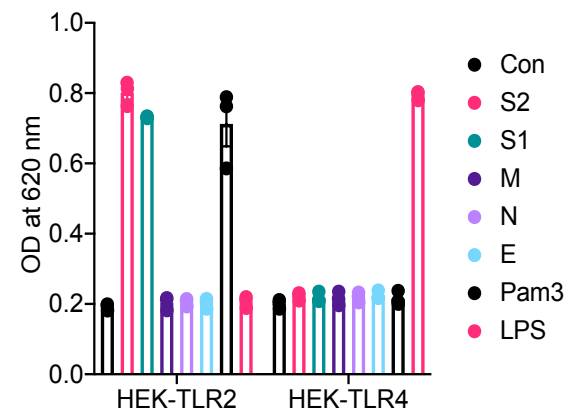

Supplement: supp [file elife_poa_e68563_Figure_6_figure_supplement_1.pdf › elife_poa_e68563_Figure_6_figure_supplement_1.pdf]
