# Supplementary material for: SARS-CoV-2 spike protein induces inflammation via TLR2-dependent activation of the NF-κB pathway
Source: eLife journal article supplement (doi:10.7554/elife.68563), 2021-12-02
Supplement: supp [file elife_poa_e68563_Transparent_Reporting_File.docx]

***eLife’s* transparent reporting form**

We encourage authors to provide detailed information *within their submission* to facilitate the interpretation and replication of experiments. Authors can upload supporting documentation to indicate the use of appropriate reporting guidelines for health-related research (see [EQUATOR Network](http://www.equator-network.org/%20)), life science research (see the [BioSharing Information Resource](https://biosharing.org/" \t "_blank)), or the [ARRIVE guidelines](http://www.plosbiology.org/article/info:doi/10.1371/journal.pbio.1000412) for reporting work involving animal research. Where applicable, authors should refer to any relevant reporting standards documents in this form.

If you have any questions, please consult our Journal Policies and/or contact us: [editorial@elifesciences.org](mailto:editorial@elifesciences.org).

**Sample-size estimation**

- You should state whether an appropriate sample size was computed when the study was being designed
- You should state the statistical method of sample size computation and any required assumptions
- If no explicit power analysis was used, you should describe how you decided what sample (replicate) size (number) to use

Please outline where this information can be found within the submission (e.g., sections or figure legends), or explain why this information doesn’t apply to your submission:

Page 26 (Statistical Analysis Section).

No statistical methods were used to predetermine sample sizes; however, sample sizes were estimated based on similar experiments we published previously (Udden SMN et al. eLife 2019; Udden SMN et al. Cell Reports, 2017).

**Replicates**

- You should report how often each experiment was performed
- You should include a definition of biological versus technical replication
- The data obtained should be provided and sufficient information should be provided to indicate the number of independent biological and/or technical replicates
- If you encountered any outliers, you should describe how these were handled
- Criteria for exclusion/inclusion of data should be clearly stated
- High-throughput sequence data should be uploaded before submission, with a private link for reviewers provided (these are available from both GEO and ArrayExpress)

Please outline where this information can be found within the submission (e.g., sections or figure legends), or explain why this information doesn’t apply to your submission:

Corresponding figure legends.

Sample sizes are indicated in the corresponding figure legends. In all in vitro studies, sample sizes indicate biological and technical replicates. In case of animal study, sample sizes indicate the number of biological replicates (number of mice).

**Statistical reporting**

- Statistical analysis methods should be described and justified
- Raw data should be presented in figures whenever informative to do so (typically when N per group is less than 10)
- For each experiment, you should identify the statistical tests used, exact values of N, definitions of center, methods of multiple test correction, and dispersion and precision measures (e.g., mean, median, SD, SEM, confidence intervals; and, for the major substantive results, a measure of effect size (e.g., Pearson's r, Cohen's d)
- Report exact p-values wherever possible alongside the summary statistics and 95% confidence intervals. These should be reported for all key questions and not only when the p-value is less than 0.05.

Please outline where this information can be found within the submission (e.g., sections or figure legends), or explain why this information doesn’t apply to your submission:

Corresponding figure legends.

Statistical analyses were performed using unpaired, two-tailed student t-test. The data bars and error bars indicate mean ± standard error mean (SEM) (for animal studies) or standard deviation (SD) (for in vitro assays).

Exact P values were used wherever possible. Otherwise, *, p value ≤ 0.05; **, p value ≤ 0.01; *** p value ≤0.001; **** p value ≤ 0.0001.

(For large datasets, or papers with a very large number of statistical tests, you may upload a single table file with tests, Ns, etc., with reference to sections in the manuscript.)

**Group allocation**

- Indicate how samples were allocated into experimental groups (in the case of clinical studies, please specify allocation to treatment method); if randomization was used, please also state if restricted randomization was applied
- Indicate if masking was used during group allocation, data collection and/or data analysis

Please outline where this information can be found within the submission (e.g., sections or figure legends), or explain why this information doesn’t apply to your submission:

Page 19 (Methods).

All mice studies were performed using age-and sex matched mice and groups were allocated randomly. No masking was used during data collection and analysis.

**Additional data files (“source data”)**

- We encourage you to upload relevant additional data files, such as numerical data that are represented as a graph in a figure, or as a summary table
- Where provided, these should be in the most useful format, and they can be uploaded as “Source data” files linked to a main figure or table
- Include model definition files including the full list of parameters used
- Include code used for data analysis (e.g., R, MatLab)
- Avoid stating that data files are “available upon request”

Please indicate the figures or tables for which source data files have been provided:

Figure 1A, 1B, 1C, 1D, and 1E

Figure 2A, 2B, 2C, 2D, 2E

Figure 3B, 3C, 3E, 3F, 3G, 3H

Figure 4D

Figure 5B, 5E, 5F, 5G, 5H

Figure 6B, 6D, 6F, 6G

Figure 1-figure supplement 1A, 1B, 1C, 1D, 1E

Figure 1-figure supplement 2A, 2B

Figure 2-figure supplement 1

Figure 3-figure supplement 1B, 1C, 1D

Figure 3-figure supplement 2A, 2B, 2D, 2E, 2G

Figure 5-figure supplement 1

Figure 5-figure supplement 2

Figure 6-figure supplement 1

Figure 6-figure supplement 2A, 2B
