# Supplementary figures and images for: SARS-CoV-2 spike protein induces inflammation via TLR2-dependent activation of the NF-κB pathway
Source: eLife journal article supplement (doi:10.7554/elife.68563), 2021-12-02

Figure 1–figure supplement 1

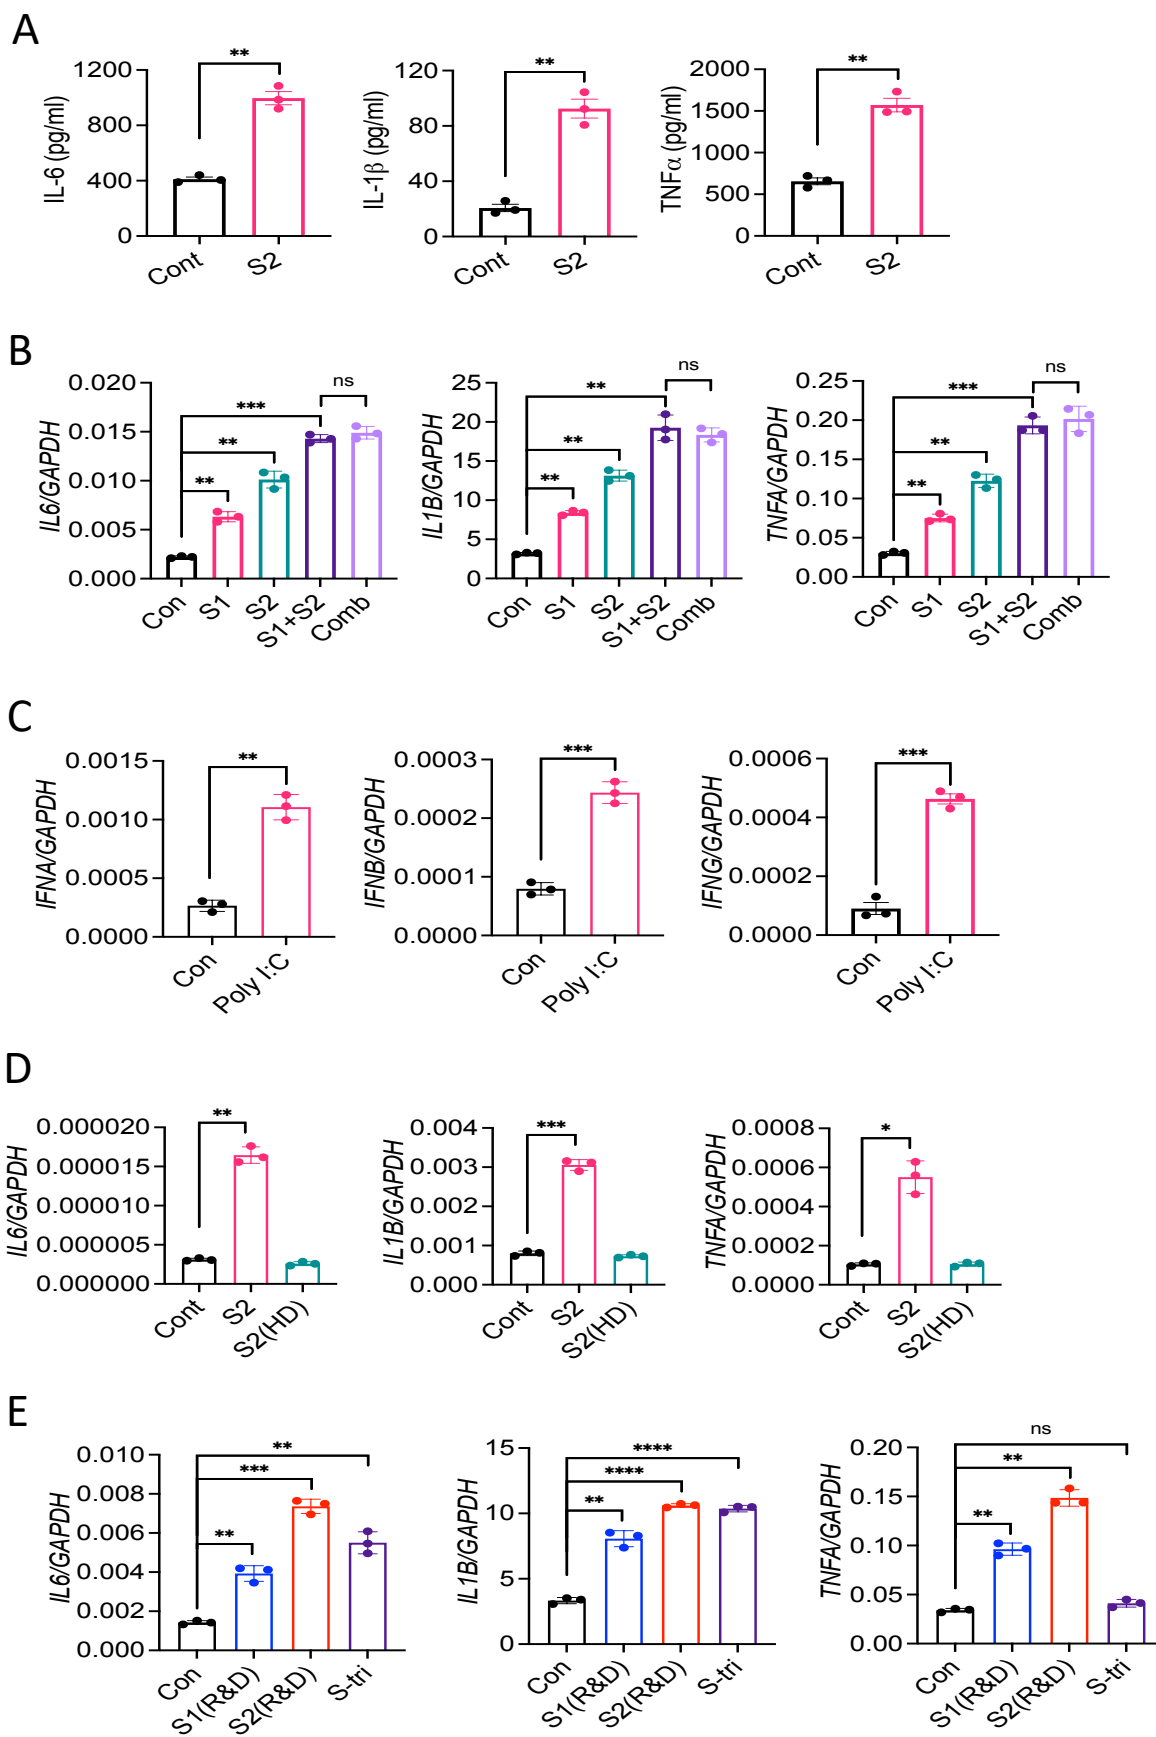

Supplement: supp [file elife_poa_e68563_Figure_1_figure_supplement_1.pdf › elife_poa_e68563_Figure_1_figure_supplement_1.pdf]

Figure 1–figure supplement 2

A

Mouse bone marrow-derived macrophages

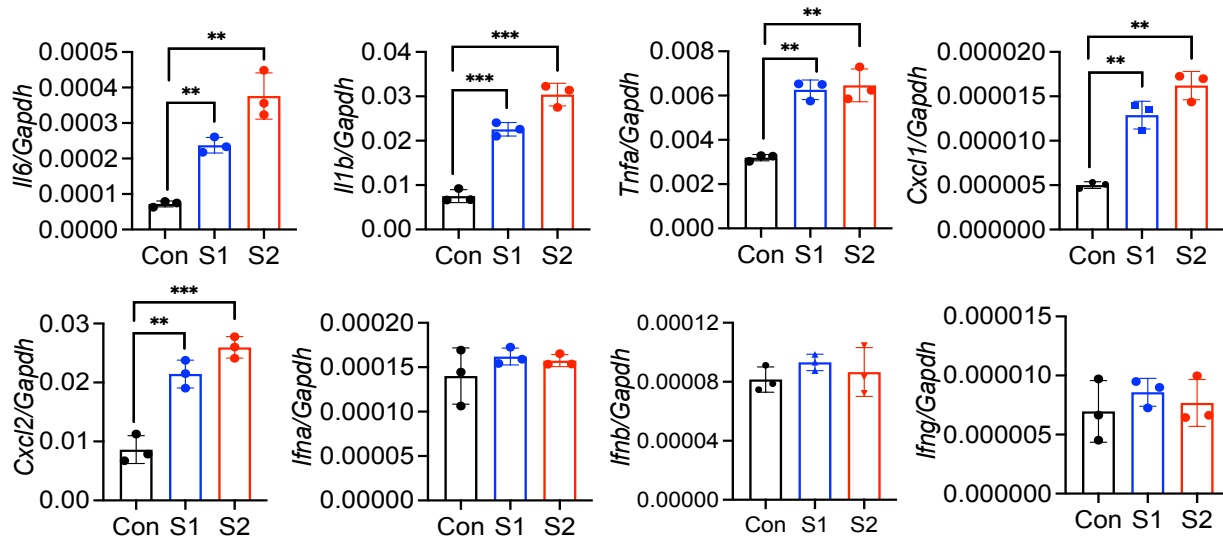

B

RAW264.7 cells

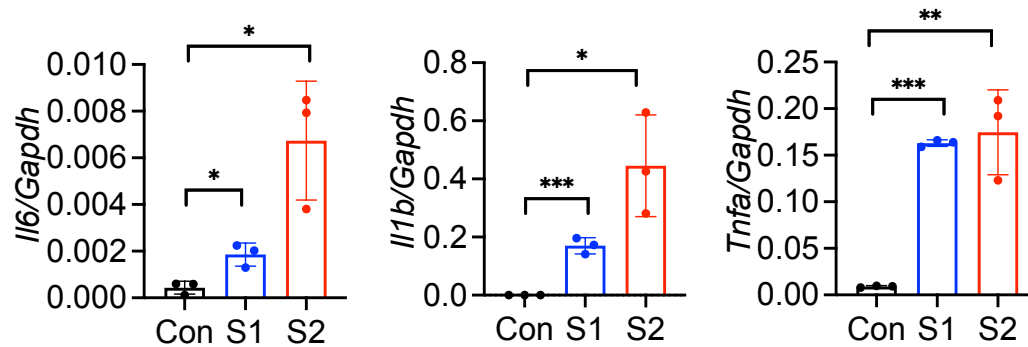

Supplement: supp [file elife_poa_e68563_Figure_1_figure_supplement_2.pdf › elife_poa_e68563_Figure_1_figure_supplement_2.pdf]

Figure 2–figure supplement 1

A

A549 cells

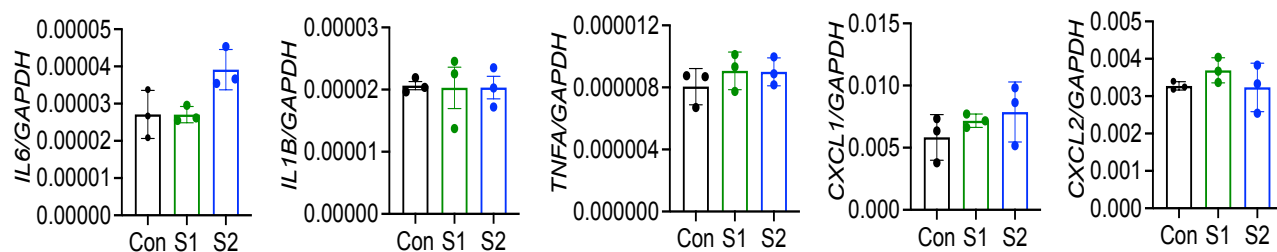

B

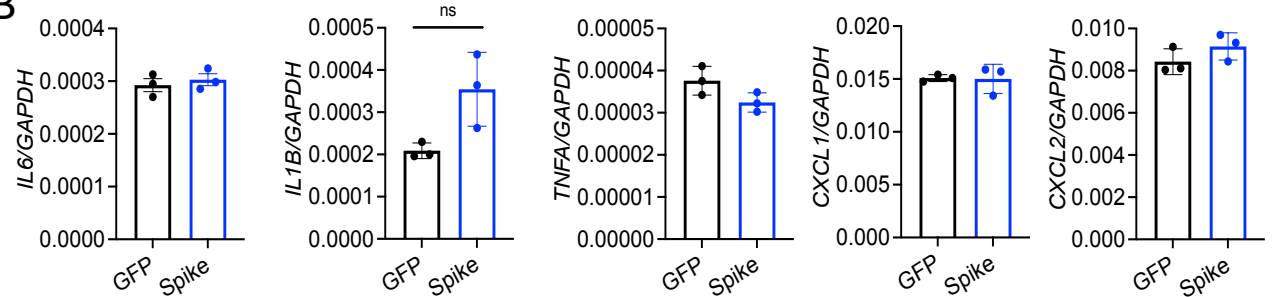

C

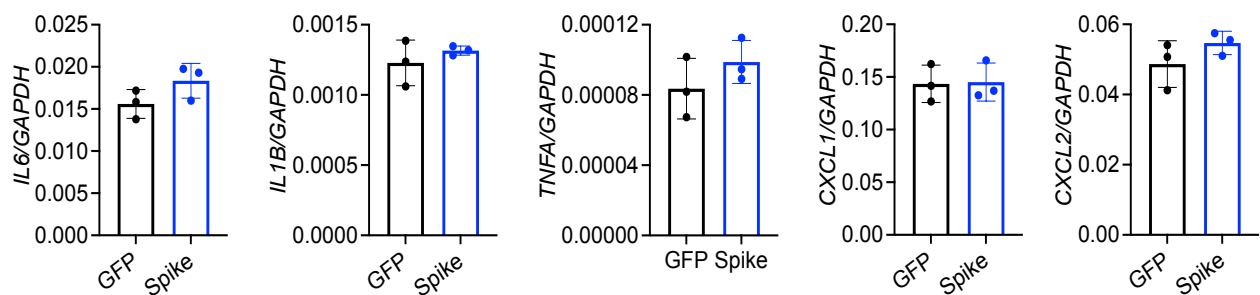

D

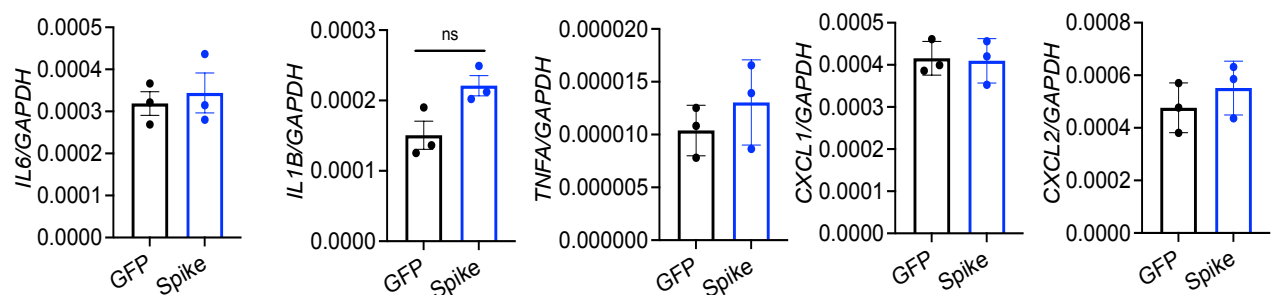

Supplement: supp [file elife_poa_e68563_Figure_2_figure_supplement_1.pdf › elife_poa_e68563_Figure_2_figure_supplement_1.pdf]

Figure 3—figure supplement 1

A

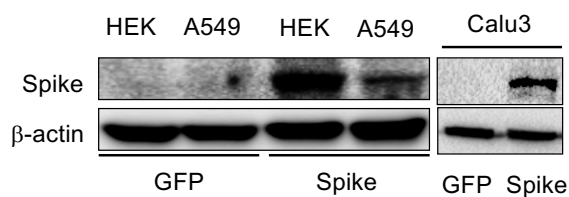

B

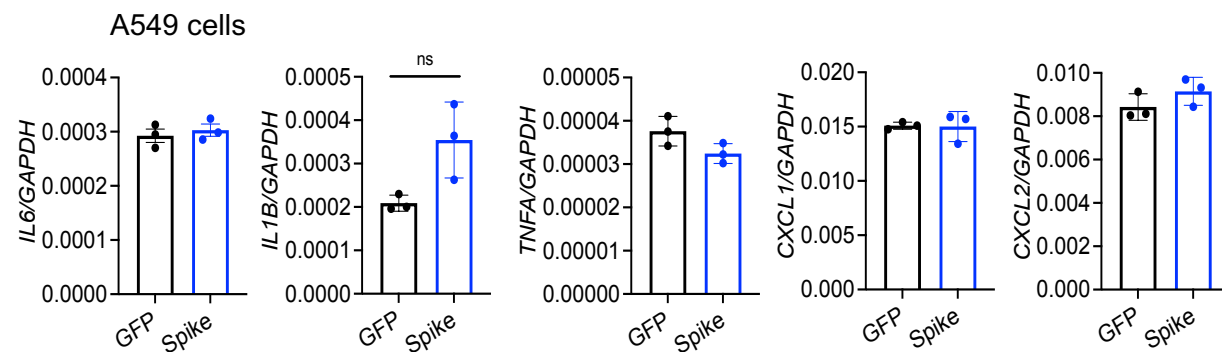

C

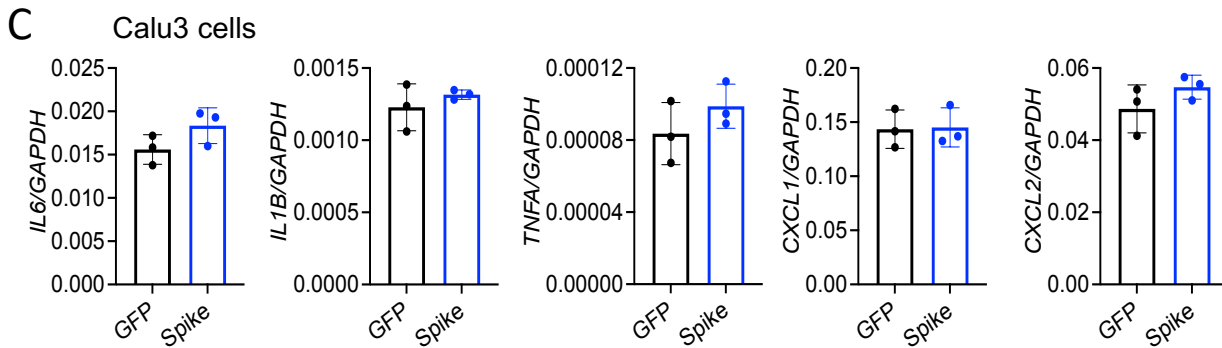

D

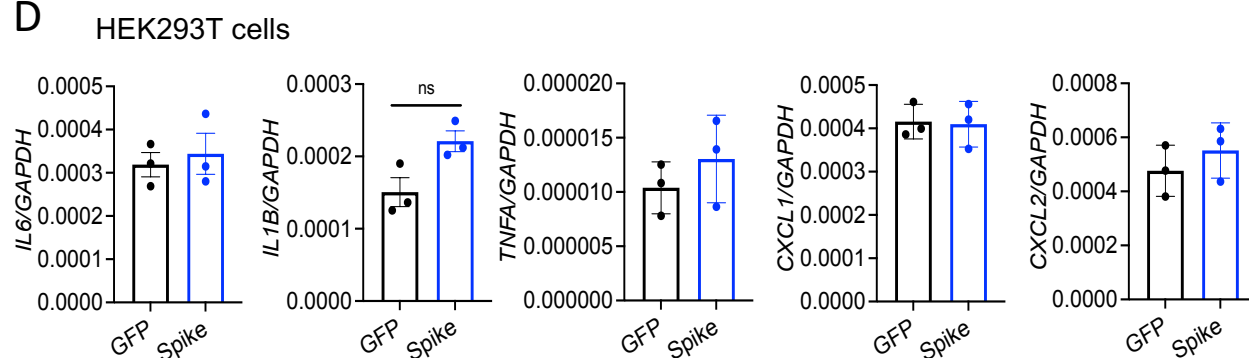

Supplement: supp [file elife_poa_e68563_Figure_3_figure_supplement_1.pdf › elife_poa_e68563_Figure_3_figure_supplement_1.pdf]

Figure 3—figure supplement 2

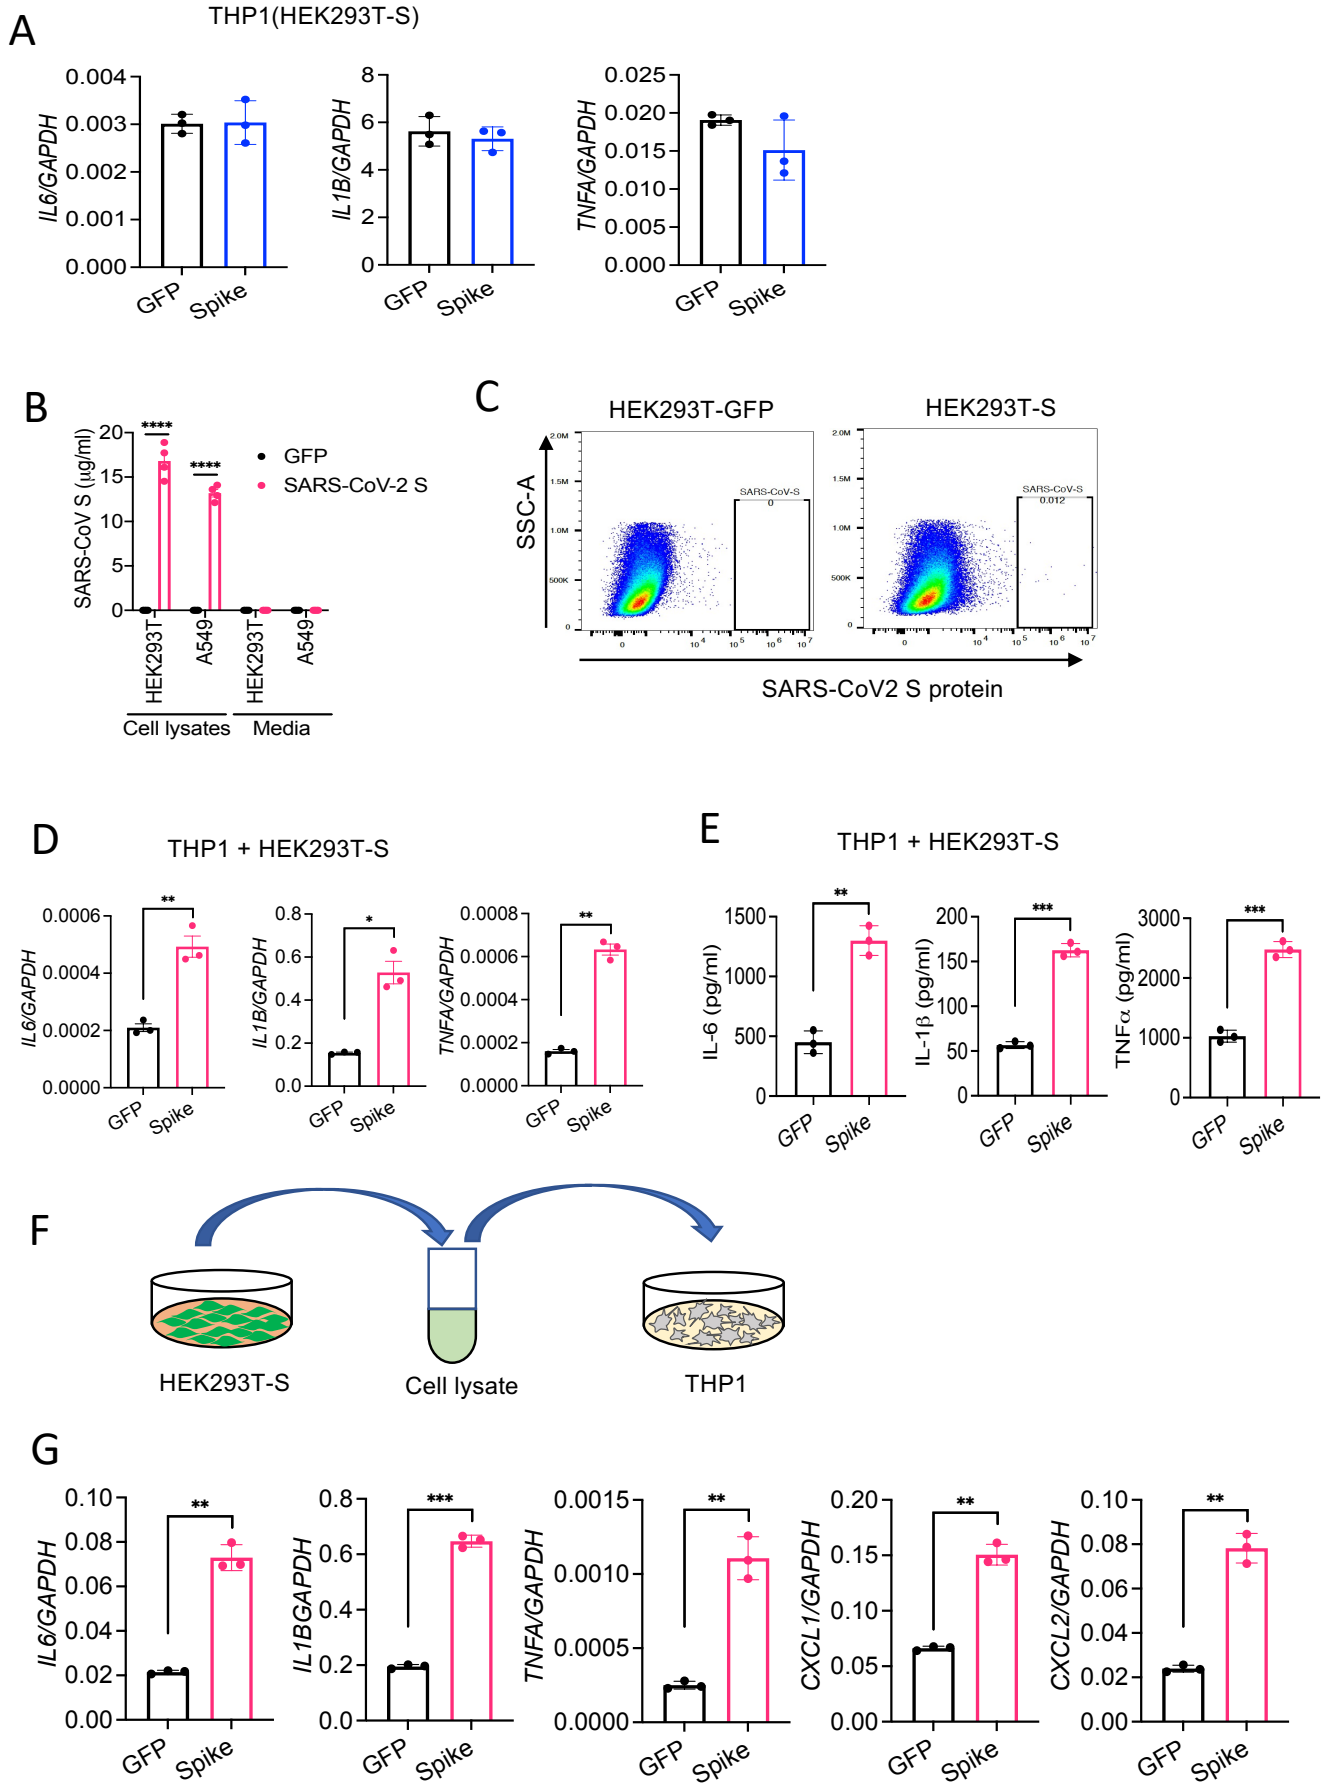

Supplement: supp [file elife_poa_e68563_Figure_3_figure_supplement_2.pdf › elife_poa_e68563_Figure_3_figure_supplement_2.pdf]

Figure 5—figure supplement 1

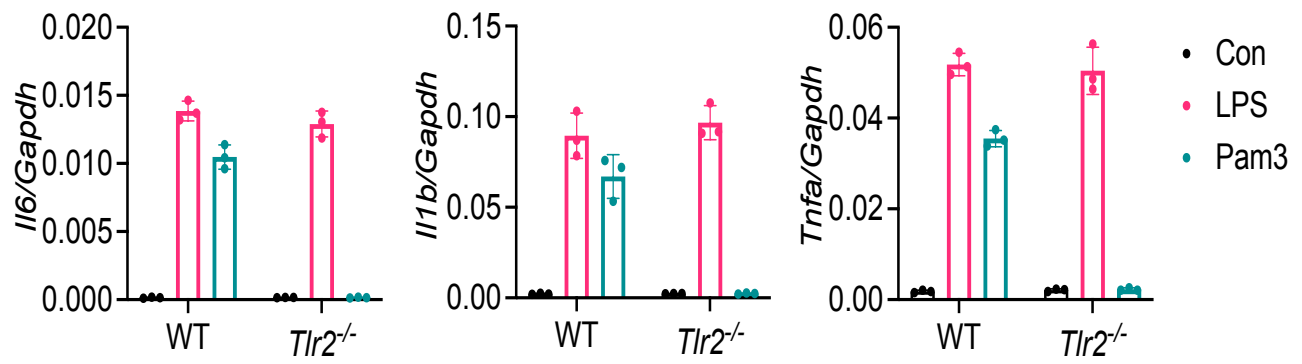

Supplement: supp [file elife_poa_e68563_Figure_5_figure_supplement_1.pdf › elife_poa_e68563_Figure_5_figure_supplement_1.pdf]

Figure 5—figure supplement 2

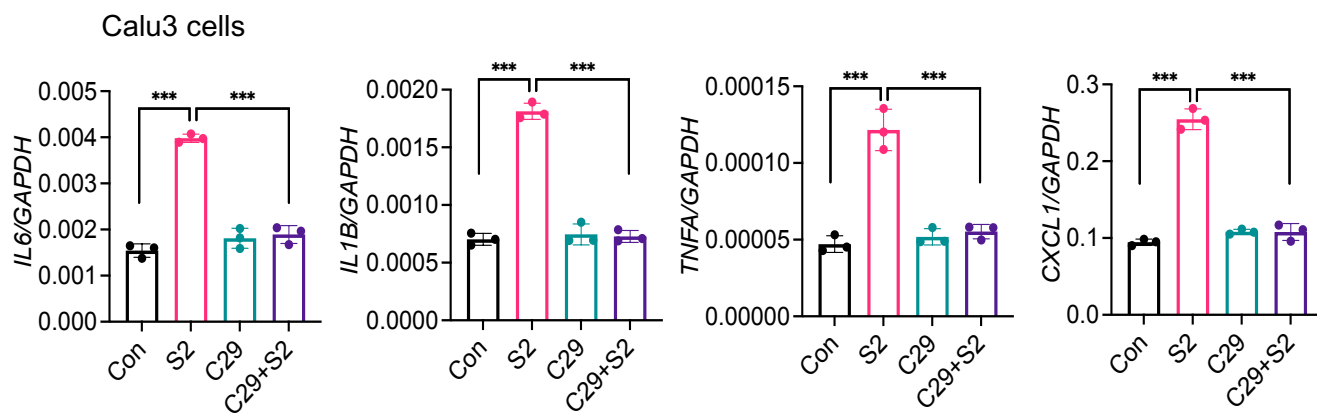

Supplement: supp [file elife_poa_e68563_Figure_5_figure_supplement_2.pdf › elife_poa_e68563_Figure_5_figure_supplement_2.pdf]

Figure 6—figure supplement 2

A

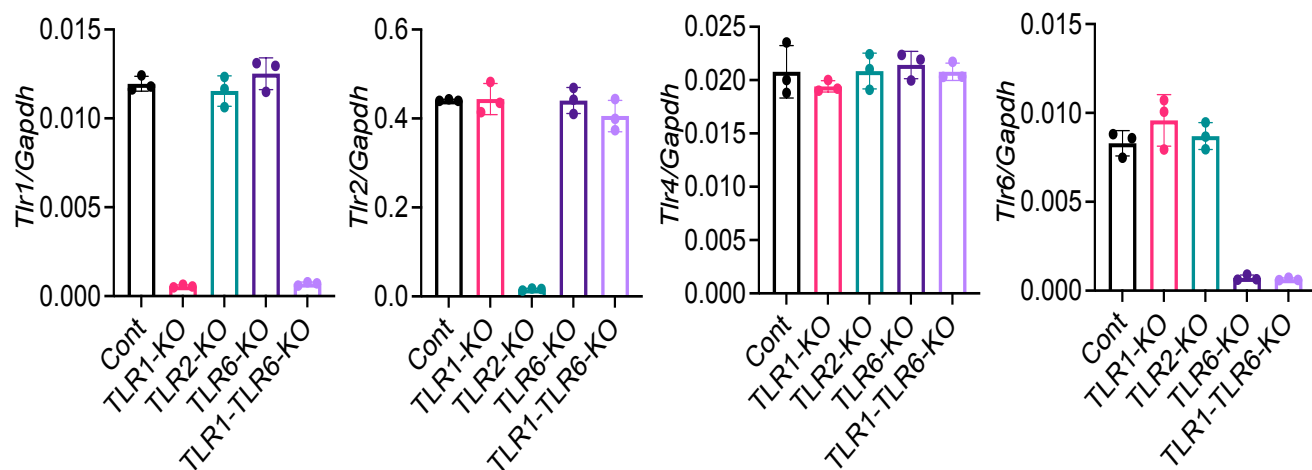

B

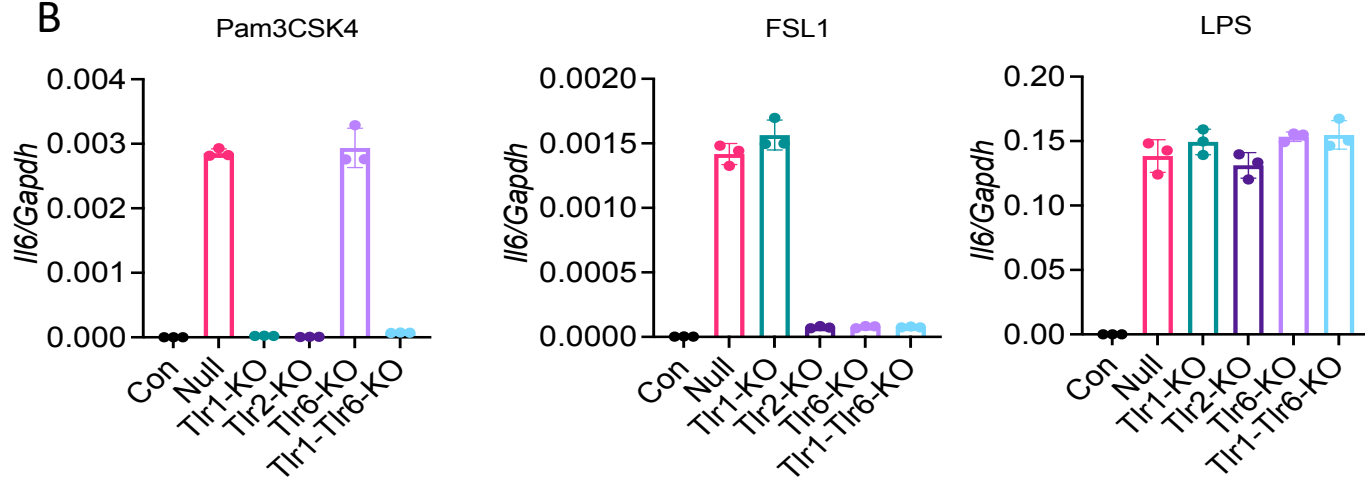

Supplement: supp [file elife_poa_e68563_Figure_6_figure_supplement_2.pdf › elife_poa_e68563_Figure_6_figure_supplement_2.pdf]
